# Supplementary material for: Defect chemistry and ion transport in low-dimensional-networked Li-rich anti-perovskites as solid electrolytes for solid-state batteries
Source: Royal Society of Chemistry journal article supplement (doi:10.1039/d3ya00075c), 2023-01-01
Supplement: d3ya00075c1.pdf [file d3ya00075c1.pdf]

—Supporting Information—

**Defect Chemistry and Ion Transport in Low-Dimensional-Networked  
Li-Rich Anti-Perovskites as Solid Electrolytes for Solid-State Batteries**

Ana Carolina Coutinho Dutra<sup>a</sup>, George Rudman<sup>a,b</sup>, Karen E. Johnston<sup>b</sup> and James A. Dawson<sup>a,c,\*</sup>

<sup>a</sup>*Chemistry – School of Natural and Environmental Sciences, Newcastle University,  
Newcastle upon Tyne, NE1 7RU, UK*

<sup>b</sup>*Department of Chemistry, Durham University, Durham, DH1 3LE, UK*

<sup>c</sup>*Centre for Energy, Newcastle University, Newcastle upon Tyne, NE1 7RU, UK*

*\*Corresponding author. E-mail: james.dawson@newcastle.ac.uk*

**Li<sub>3</sub>OCl CIF**

data\_VESTA\_phase\_1

|                           |              |
|---------------------------|--------------|
| _chemical_name_common     | 'Li3 Cl1 O1' |
| _cell_length_a            | 3.908337     |
| _cell_length_b            | 3.908337     |
| _cell_length_c            | 3.908337     |
| _cell_angle_alpha         | 90.000000    |
| _cell_angle_beta          | 90.000000    |
| _cell_angle_gamma         | 90.000000    |
| _cell_volume              | 59.700236    |
| _space_group_name_H-M_alt | 'P 1'        |
| _space_group_IT_number    | 1            |

loop\_

\_space\_group\_symop\_operation\_xyz

'x, y, z'

loop\_

\_atom\_site\_label

\_atom\_site\_occupancy

\_atom\_site\_fract\_x

\_atom\_site\_fract\_y

\_atom\_site\_fract\_z

\_atom\_site\_adp\_type

\_atom\_site\_U\_iso\_or\_equiv

\_atom\_site\_type\_symbol

|     |     |          |          |          |      |      |
|-----|-----|----------|----------|----------|------|------|
| Li0 | 1.0 | 0.000000 | 0.500000 | 0.500000 | Uiso | ? Li |
| Li1 | 1.0 | 0.500000 | 0.000000 | 0.500000 | Uiso | ? Li |
| Li2 | 1.0 | 0.500000 | 0.500000 | 0.000000 | Uiso | ? Li |
| Cl3 | 1.0 | 0.000000 | 0.000000 | 0.000000 | Uiso | ? Cl |
| O4  | 1.0 | 0.500000 | 0.500000 | 0.500000 | Uiso | ? O  |

## Li<sub>3</sub>OBr CIF

data\_VESTA\_phase\_1

|                           |                 |
|---------------------------|-----------------|
| _chemical_name_common     | 'New structure' |
| _cell_length_a            | 4.000000        |
| _cell_length_b            | 4.000000        |
| _cell_length_c            | 4.000000        |
| _cell_angle_alpha         | 90.000000       |
| _cell_angle_beta          | 90.000000       |
| _cell_angle_gamma         | 90.000000       |
| _cell_volume              | 64.000000       |
| _space_group_name_H-M_alt | 'P 1'           |
| _space_group_IT_number    | 1               |

loop\_

\_space\_group\_symop\_operation\_xyz

'x, y, z'

loop\_

\_atom\_site\_label

\_atom\_site\_occupancy

\_atom\_site\_fract\_x

\_atom\_site\_fract\_y

\_atom\_site\_fract\_z

\_atom\_site\_adp\_type

\_atom\_site\_U\_iso\_or\_equiv

\_atom\_site\_type\_symbol

|     |     |          |          |          |           |
|-----|-----|----------|----------|----------|-----------|
| Br1 | 1.0 | 0.000000 | 0.000000 | 0.000000 | Uiso ? Br |
| O1  | 1.0 | 0.500000 | 0.500000 | 0.500000 | Uiso ? O  |
| Li1 | 1.0 | 0.500000 | 0.500000 | 0.000000 | Uiso ? Li |
| Li2 | 1.0 | 0.500000 | 0.000000 | 0.500000 | Uiso ? Li |
| Li3 | 1.0 | 0.000000 | 0.500000 | 0.500000 | Uiso ? Li |

## Li<sub>4</sub>OCl<sub>2</sub> CIF

data\_cif

\_audit\_creation\_method 'generated by GULP'

\_symmetry\_space\_group\_name\_H-M 'P 1'

\_symmetry\_Int\_Tables\_number 1

\_symmetry\_cell\_setting triclinic

\_cell\_length\_a 3.9043

\_cell\_length\_b 3.9043

\_cell\_length\_c 12.5990

\_cell\_angle\_alpha 90.0000

\_cell\_angle\_beta 90.0000

\_cell\_angle\_gamma 90.0000

loop\_

\_atom\_site\_label

\_atom\_site\_fract\_x

\_atom\_site\_fract\_y

\_atom\_site\_fract\_z

\_atom\_site\_occupancy

Li 0.00000 0.50000 0.00000 1.0000

Li 0.50000 0.00000 0.00000 1.0000

Li 0.50000 1.00000 0.50000 1.0000

|    |         |         |         |        |
|----|---------|---------|---------|--------|
| Li | 0.00000 | 0.50000 | 0.50000 | 1.0000 |
| Li | 1.00000 | 0.00000 | 0.15304 | 1.0000 |
| Li | 0.00000 | 0.00000 | 0.84696 | 1.0000 |
| Li | 0.50000 | 0.50000 | 0.65304 | 1.0000 |
| Li | 0.50000 | 0.50000 | 0.34696 | 1.0000 |
| Cl | 0.00000 | 1.00000 | 0.34637 | 1.0000 |
| Cl | 0.00000 | 1.00000 | 0.65363 | 1.0000 |
| Cl | 0.50000 | 0.50000 | 0.84637 | 1.0000 |
| Cl | 0.50000 | 0.50000 | 0.15363 | 1.0000 |
| O  | 1.00000 | 0.00000 | 0.00000 | 1.0000 |
| O  | 0.50000 | 0.50000 | 0.50000 | 1.0000 |

## Li<sub>4</sub>OBr<sub>2</sub> CIF

data\_VESTA\_phase\_1

|                           |                 |
|---------------------------|-----------------|
| _chemical_name_common     | 'New structure' |
| _cell_length_a            | 3.904336        |
| _cell_length_b            | 3.904336        |
| _cell_length_c            | 11.599001       |
| _cell_angle_alpha         | 90.000000       |
| _cell_angle_beta          | 90.000000       |
| _cell_angle_gamma         | 90.000000       |
| _cell_volume              | 176.813308      |
| _space_group_name_H-M_alt | 'P 1'           |
| _space_group_IT_number    | 1               |

loop\_

\_space\_group\_symop\_operation\_xyz

'x, y, z'

loop\_

\_atom\_site\_label

\_atom\_site\_occupancy

\_atom\_site\_fract\_x

\_atom\_site\_fract\_y

\_atom\_site\_fract\_z

\_atom\_site\_adp\_type

\_atom\_site\_U\_iso\_or\_equiv

\_atom\_site\_type\_symbol

|     |     |          |          |          |           |
|-----|-----|----------|----------|----------|-----------|
| Li1 | 1.0 | 0.000000 | 0.500000 | 0.000000 | Uiso ? Li |
| Li2 | 1.0 | 0.500000 | 0.000000 | 0.000000 | Uiso ? Li |
| Li3 | 1.0 | 0.500000 | 1.000000 | 0.500000 | Uiso ? Li |
| Li4 | 1.0 | 0.000000 | 0.500000 | 0.500000 | Uiso ? Li |
| Li5 | 1.0 | 1.000000 | 0.000000 | 0.153038 | Uiso ? Li |
| Li6 | 1.0 | 0.000000 | 0.000000 | 0.846962 | Uiso ? Li |
| Li7 | 1.0 | 0.500000 | 0.500000 | 0.653038 | Uiso ? Li |
| Li8 | 1.0 | 0.500000 | 0.500000 | 0.346962 | Uiso ? Li |
| Br1 | 1.0 | 0.000000 | 1.000000 | 0.346373 | Uiso ? Br |
| Br2 | 1.0 | 0.000000 | 1.000000 | 0.653627 | Uiso ? Br |
| Br3 | 1.0 | 0.500000 | 0.500000 | 0.846373 | Uiso ? Br |
| Br4 | 1.0 | 0.500000 | 0.500000 | 0.153627 | Uiso ? Br |
| O1  | 1.0 | 1.000000 | 0.000000 | 0.000000 | Uiso ? O  |
| O2  | 1.0 | 0.500000 | 0.500000 | 0.500000 | Uiso ? O  |
| Br5 | 1.0 | 0.000000 | 1.000000 | 0.346550 | Uiso ? Br |
| Br6 | 1.0 | 0.000000 | 0.000000 | 0.653450 | Uiso ? Br |
| Br7 | 1.0 | 0.500000 | 0.500000 | 0.846550 | Uiso ? Br |
| Br8 | 1.0 | 0.500000 | 0.500000 | 0.153450 | Uiso ? Br |
| O3  | 1.0 | 1.000000 | 0.000000 | 0.000000 | Uiso ? O  |
| O4  | 1.0 | 0.500000 | 0.500000 | 0.500000 | Uiso ? O  |



## Li<sub>5</sub>OCl<sub>3</sub> CIF

data\_cif

\_audit\_creation\_method 'generated by GULP'

\_symmetry\_space\_group\_name\_H-M 'P 1'

\_symmetry\_Int\_Tables\_number 1

\_symmetry\_cell\_setting triclinic

\_cell\_length\_a 7.7384

\_cell\_length\_b 5.9300

\_cell\_length\_c 11.6909

\_cell\_angle\_alpha 90.0013

\_cell\_angle\_beta 89.9993

\_cell\_angle\_gamma 90.0011

loop\_

\_atom\_site\_label

\_atom\_site\_fract\_x

\_atom\_site\_fract\_y

\_atom\_site\_fract\_z

\_atom\_site\_occupancy

|    |         |         |         |        |
|----|---------|---------|---------|--------|
| Li | 0.63333 | 0.52653 | 0.62577 | 1.0000 |
|----|---------|---------|---------|--------|

|    |         |         |         |        |
|----|---------|---------|---------|--------|
| Li | 0.36204 | 0.57358 | 0.36697 | 1.0000 |
|----|---------|---------|---------|--------|

|    |         |         |         |        |
|----|---------|---------|---------|--------|
| Li | 0.86203 | 0.02651 | 0.36699 | 1.0000 |
|----|---------|---------|---------|--------|

|    |         |         |         |        |
|----|---------|---------|---------|--------|
| Li | 0.13333 | 0.07357 | 0.62577 | 1.0000 |
| Li | 0.36204 | 0.57359 | 0.12577 | 1.0000 |
| Li | 0.63332 | 0.52657 | 0.86696 | 1.0000 |
| Li | 0.13332 | 0.07358 | 0.86697 | 1.0000 |
| Li | 0.86204 | 0.02654 | 0.12578 | 1.0000 |
| Li | 0.63334 | 0.07356 | 0.86697 | 1.0000 |
| Li | 0.36192 | 0.02659 | 0.12579 | 1.0000 |
| Li | 0.86191 | 0.57354 | 0.12578 | 1.0000 |
| Li | 0.13334 | 0.52658 | 0.86696 | 1.0000 |
| Li | 0.36191 | 0.02659 | 0.36696 | 1.0000 |
| Li | 0.63335 | 0.07352 | 0.62579 | 1.0000 |
| Li | 0.13335 | 0.52658 | 0.62578 | 1.0000 |
| Li | 0.86191 | 0.57351 | 0.36696 | 1.0000 |
| Li | 0.37856 | 0.30004 | 0.74637 | 1.0000 |
| Li | 0.61676 | 0.80020 | 0.24638 | 1.0000 |
| Li | 0.11676 | 0.79991 | 0.24638 | 1.0000 |
| Li | 0.87855 | 0.30008 | 0.74637 | 1.0000 |
| Cl | 0.33582 | 0.80008 | 0.74638 | 1.0000 |
| Cl | 0.65951 | 0.30003 | 0.24637 | 1.0000 |
| Cl | 0.15951 | 0.30008 | 0.24637 | 1.0000 |
| Cl | 0.83582 | 0.80006 | 0.74638 | 1.0000 |
| Cl | 0.37884 | 0.30006 | 0.97079 | 1.0000 |
| Cl | 0.61647 | 0.80005 | 0.02196 | 1.0000 |
| Cl | 0.11647 | 0.80008 | 0.02196 | 1.0000 |
| Cl | 0.87884 | 0.30007 | 0.97079 | 1.0000 |

|    |         |         |         |        |
|----|---------|---------|---------|--------|
| Cl | 0.61647 | 0.80005 | 0.47080 | 1.0000 |
| Cl | 0.37884 | 0.30006 | 0.52195 | 1.0000 |
| Cl | 0.87885 | 0.30006 | 0.52195 | 1.0000 |
| Cl | 0.11647 | 0.80007 | 0.47079 | 1.0000 |
| O  | 0.62569 | 0.30005 | 0.74637 | 1.0000 |
| O  | 0.36962 | 0.80008 | 0.24638 | 1.0000 |
| O  | 0.86962 | 0.80004 | 0.24638 | 1.0000 |
| O  | 0.12569 | 0.30007 | 0.74637 | 1.0000 |

## Li<sub>5</sub>OBr<sub>3</sub> CIF

data\_VESTA\_phase\_1

|                           |                 |
|---------------------------|-----------------|
| _chemical_name_common     | 'New structure' |
| _cell_length_a            | 8.500000        |
| _cell_length_b            | 6.300000        |
| _cell_length_c            | 13.000000       |
| _cell_angle_alpha         | 90.000000       |
| _cell_angle_beta          | 90.000000       |
| _cell_angle_gamma         | 90.000000       |
| _cell_volume              | 696.150021      |
| _space_group_name_H-M_alt | 'P 1'           |
| _space_group_IT_number    | 1               |

loop\_

\_space\_group\_symop\_operation\_xyz

'x, y, z'

loop\_

\_atom\_site\_label

\_atom\_site\_occupancy

\_atom\_site\_fract\_x

\_atom\_site\_fract\_y

\_atom\_site\_fract\_z

\_atom\_site\_adp\_type

\_atom\_site\_U\_iso\_or\_equiv

\_atom\_site\_type\_symbol

|      |     |          |          |          |           |
|------|-----|----------|----------|----------|-----------|
| Li1  | 1.0 | 0.633330 | 0.526530 | 0.625770 | Uiso ? Li |
| Li2  | 1.0 | 0.863210 | 0.609350 | 0.348160 | Uiso ? Li |
| Li3  | 1.0 | 0.363210 | 0.026560 | 0.348160 | Uiso ? Li |
| Li4  | 1.0 | 0.133330 | 0.109360 | 0.625760 | Uiso ? Li |
| Li5  | 1.0 | 0.863210 | 0.609350 | 0.125770 | Uiso ? Li |
| Li6  | 1.0 | 0.633330 | 0.526550 | 0.848160 | Uiso ? Li |
| Li7  | 1.0 | 0.133330 | 0.109360 | 0.848160 | Uiso ? Li |
| Li8  | 1.0 | 0.363210 | 0.026560 | 0.125760 | Uiso ? Li |
| Li9  | 1.0 | 0.633360 | 0.109320 | 0.848160 | Uiso ? Li |
| Li10 | 1.0 | 0.863210 | 0.026560 | 0.125770 | Uiso ? Li |
| Li11 | 1.0 | 0.363210 | 0.609340 | 0.125760 | Uiso ? Li |
| Li12 | 1.0 | 0.133360 | 0.526580 | 0.848150 | Uiso ? Li |
| Li13 | 1.0 | 0.863210 | 0.026560 | 0.348160 | Uiso ? Li |
| Li14 | 1.0 | 0.633340 | 0.109310 | 0.625770 | Uiso ? Li |
| Li15 | 1.0 | 0.133360 | 0.526580 | 0.625770 | Uiso ? Li |
| Li16 | 1.0 | 0.363210 | 0.609340 | 0.348160 | Uiso ? Li |
| Li17 | 1.0 | 0.383820 | 0.317900 | 0.736960 | Uiso ? Li |
| Li18 | 1.0 | 0.112740 | 0.817950 | 0.236960 | Uiso ? Li |
| Li19 | 1.0 | 0.612720 | 0.817950 | 0.236960 | Uiso ? Li |
| Li20 | 1.0 | 0.883810 | 0.318000 | 0.736960 | Uiso ? Li |
| Br1  | 1.0 | 0.291370 | 0.817980 | 0.736960 | Uiso ? Br |
| Br2  | 1.0 | 0.205170 | 0.317950 | 0.236960 | Uiso ? Br |
| Br3  | 1.0 | 0.705180 | 0.317950 | 0.236960 | Uiso ? Br |

|      |     |          |          |          |           |
|------|-----|----------|----------|----------|-----------|
| Br4  | 1.0 | 0.791370 | 0.817920 | 0.736960 | Uiso ? Br |
| Br5  | 1.0 | 0.379280 | 0.317960 | 0.942690 | Uiso ? Br |
| Br6  | 1.0 | 0.117280 | 0.817950 | 0.031230 | Uiso ? Br |
| Br7  | 1.0 | 0.617280 | 0.817950 | 0.031230 | Uiso ? Br |
| Br8  | 1.0 | 0.879280 | 0.317950 | 0.942690 | Uiso ? Br |
| Br9  | 1.0 | 0.117280 | 0.817950 | 0.442690 | Uiso ? Br |
| Br10 | 1.0 | 0.379280 | 0.317940 | 0.531230 | Uiso ? Br |
| Br11 | 1.0 | 0.879280 | 0.317950 | 0.531230 | Uiso ? Br |
| Br12 | 1.0 | 0.617280 | 0.817950 | 0.442690 | Uiso ? Br |
| O1   | 1.0 | 0.620340 | 0.317930 | 0.736960 | Uiso ? O  |
| O2   | 1.0 | 0.876210 | 0.817950 | 0.236960 | Uiso ? O  |
| O3   | 1.0 | 0.376200 | 0.817950 | 0.236960 | Uiso ? O  |
| O4   | 1.0 | 0.120360 | 0.317970 | 0.736960 | Uiso ? O  |
| Br13 | 1.0 | 0.291370 | 0.817980 | 0.736960 | Uiso ? Br |
| Br14 | 1.0 | 0.205170 | 0.317950 | 0.236960 | Uiso ? Br |
| Br15 | 1.0 | 0.705180 | 0.317950 | 0.236960 | Uiso ? Br |
| Br16 | 1.0 | 0.791370 | 0.817920 | 0.736960 | Uiso ? Br |
| Br17 | 1.0 | 0.379280 | 0.317960 | 0.942690 | Uiso ? Br |
| Br18 | 1.0 | 0.117280 | 0.817950 | 0.031230 | Uiso ? Br |
| Br19 | 1.0 | 0.617280 | 0.817950 | 0.031230 | Uiso ? Br |
| Br20 | 1.0 | 0.879280 | 0.317950 | 0.942690 | Uiso ? Br |
| Br21 | 1.0 | 0.117280 | 0.817950 | 0.442690 | Uiso ? Br |
| Br22 | 1.0 | 0.379280 | 0.317940 | 0.531230 | Uiso ? Br |
| Br23 | 1.0 | 0.879280 | 0.317950 | 0.531230 | Uiso ? Br |
| Br24 | 1.0 | 0.617280 | 0.817950 | 0.442690 | Uiso ? Br |

|    |     |          |          |          |          |
|----|-----|----------|----------|----------|----------|
| O5 | 1.0 | 0.620340 | 0.317930 | 0.736960 | Uiso ? O |
| O6 | 1.0 | 0.876210 | 0.817950 | 0.236960 | Uiso ? O |
| O7 | 1.0 | 0.376200 | 0.817950 | 0.236960 | Uiso ? O |
| O8 | 1.0 | 0.120360 | 0.317970 | 0.736960 | Uiso ? O |

## Li<sub>6</sub>OCl<sub>4</sub> CIF

data\_cif

\_audit\_creation\_method 'generated by GULP'

\_symmetry\_space\_group\_name\_H-M 'P 1'

\_symmetry\_Int\_Tables\_number 1

\_symmetry\_cell\_setting triclinic

\_cell\_length\_a 7.1969

\_cell\_length\_b 6.7647

\_cell\_length\_c 7.2117

\_cell\_angle\_alpha 90.0135

\_cell\_angle\_beta 95.4091

\_cell\_angle\_gamma 89.9876

loop\_

\_atom\_site\_label

\_atom\_site\_fract\_x

\_atom\_site\_fract\_y

\_atom\_site\_fract\_z

\_atom\_site\_occupancy

|    |         |         |         |        |
|----|---------|---------|---------|--------|
| Cl | 0.83052 | 0.24256 | 0.33877 | 1.0000 |
|----|---------|---------|---------|--------|

|    |         |         |         |        |
|----|---------|---------|---------|--------|
| Cl | 0.07518 | 0.74173 | 0.58339 | 1.0000 |
|----|---------|---------|---------|--------|

|    |         |         |         |        |
|----|---------|---------|---------|--------|
| Cl | 0.65751 | 0.74257 | 0.16663 | 1.0000 |
|----|---------|---------|---------|--------|



|    |         |         |         |        |
|----|---------|---------|---------|--------|
| Cl | 0.41334 | 0.24175 | 0.92257 | 1.0000 |
| Cl | 0.84469 | 0.39024 | 0.80678 | 1.0000 |
| Cl | 0.18998 | 0.59319 | 0.15281 | 1.0000 |
| Cl | 0.64402 | 0.89034 | 0.69877 | 1.0000 |
| Cl | 0.29815 | 0.09325 | 0.35333 | 1.0000 |
| Li | 0.99042 | 0.91930 | 0.26672 | 1.0000 |
| Li | 0.97148 | 0.04064 | 0.73786 | 1.0000 |
| Li | 0.49788 | 0.41944 | 0.23898 | 1.0000 |
| Li | 0.51727 | 0.54052 | 0.76812 | 1.0000 |
| Li | 0.26018 | 0.94145 | 0.02721 | 1.0000 |
| Li | 0.73027 | 0.06574 | 0.00569 | 1.0000 |
| Li | 0.22842 | 0.44137 | 0.47892 | 1.0000 |
| Li | 0.75805 | 0.56585 | 0.50000 | 1.0000 |
| Li | 0.05944 | 0.26296 | 0.06553 | 1.0000 |
| Li | 0.93037 | 0.72051 | 0.93939 | 1.0000 |
| Li | 0.42871 | 0.76297 | 0.44061 | 1.0000 |
| Li | 0.55837 | 0.22051 | 0.56611 | 1.0000 |
| O  | 0.00104 | 0.99172 | 0.99635 | 1.0000 |
| O  | 0.48748 | 0.49178 | 0.50954 | 1.0000 |

## Li<sub>6</sub>OBr<sub>4</sub> CIF

data\_VESTA\_phase\_1

|                           |                 |
|---------------------------|-----------------|
| _chemical_name_common     | 'New structure' |
| _cell_length_a            | 7.776548        |
| _cell_length_b            | 7.305370        |
| _cell_length_c            | 7.776600        |
| _cell_angle_alpha         | 90.000000       |
| _cell_angle_beta          | 94.241402       |
| _cell_angle_gamma         | 90.000000       |
| _cell_volume              | 440.583043      |
| _space_group_name_H-M_alt | 'P 1'           |
| _space_group_IT_number    | 1               |

loop\_

\_space\_group\_symop\_operation\_xyz

'x, y, z'

loop\_

\_atom\_site\_label

\_atom\_site\_occupancy

\_atom\_site\_fract\_x

\_atom\_site\_fract\_y

\_atom\_site\_fract\_z

\_atom\_site\_adp\_type

\_atom\_site\_U\_iso\_or\_equiv

\_atom\_site\_type\_symbol

|      |     |          |          |          |           |
|------|-----|----------|----------|----------|-----------|
| Br1  | 1.0 | 0.830520 | 0.242564 | 0.338774 | Uiso ? Br |
| Br2  | 1.0 | 0.181879 | 0.742550 | 0.690134 | Uiso ? Br |
| Br3  | 1.0 | 0.681879 | 0.742564 | 0.190134 | Uiso ? Br |
| Br4  | 1.0 | 0.330520 | 0.242550 | 0.838774 | Uiso ? Br |
| Br5  | 1.0 | 0.822528 | 0.375991 | 0.830790 | Uiso ? Br |
| Br6  | 1.0 | 0.189874 | 0.609122 | 0.198121 | Uiso ? Br |
| Br7  | 1.0 | 0.689874 | 0.875992 | 0.698120 | Uiso ? Br |
| Br8  | 1.0 | 0.322528 | 0.109122 | 0.330790 | Uiso ? Br |
| Li1  | 1.0 | 0.004155 | 0.931049 | 0.254962 | Uiso ? Li |
| Li2  | 1.0 | 0.008244 | 0.054063 | 0.773953 | Uiso ? Li |
| Li3  | 1.0 | 0.508244 | 0.431051 | 0.273953 | Uiso ? Li |
| Li4  | 1.0 | 0.504155 | 0.554065 | 0.754962 | Uiso ? Li |
| Li5  | 1.0 | 0.246697 | 0.931002 | 0.012467 | Uiso ? Li |
| Li6  | 1.0 | 0.765703 | 0.054108 | 0.016453 | Uiso ? Li |
| Li7  | 1.0 | 0.265703 | 0.431006 | 0.516453 | Uiso ? Li |
| Li8  | 1.0 | 0.746697 | 0.554112 | 0.516453 | Uiso ? Li |
| Li9  | 1.0 | 0.071128 | 0.258908 | 0.079351 | Uiso ? Li |
| Li10 | 1.0 | 0.941271 | 0.726206 | 0.949569 | Uiso ? Li |
| Li11 | 1.0 | 0.441271 | 0.758908 | 0.449569 | Uiso ? Li |
| Li12 | 1.0 | 0.571128 | 0.226206 | 0.579351 | Uiso ? Li |
| O1   | 1.0 | 0.006200 | 0.992555 | 0.014458 | Uiso ? O  |
| O2   | 1.0 | 0.506200 | 0.492559 | 0.514458 | Uiso ? O  |
| Br9  | 1.0 | 0.828744 | 0.242560 | 0.336999 | Uiso ? Br |

|      |     |          |          |          |           |
|------|-----|----------|----------|----------|-----------|
| Br10 | 1.0 | 0.183656 | 0.742552 | 0.691908 | Uiso ? Br |
| Br11 | 1.0 | 0.683656 | 0.742561 | 0.191908 | Uiso ? Br |
| Br12 | 1.0 | 0.328744 | 0.242554 | 0.836999 | Uiso ? Br |
| Br13 | 1.0 | 0.821463 | 0.373942 | 0.829728 | Uiso ? Br |
| Br14 | 1.0 | 0.190938 | 0.611171 | 0.199182 | Uiso ? Br |
| Br15 | 1.0 | 0.690938 | 0.873943 | 0.699183 | Uiso ? Br |
| Br16 | 1.0 | 0.321463 | 0.111172 | 0.329728 | Uiso ? Br |
| O3   | 1.0 | 0.006200 | 0.992555 | 0.014458 | Uiso ? O  |
| O4   | 1.0 | 0.506200 | 0.492559 | 0.514458 | Uiso ? O  |

## Example LAMMPS input file

```
#####  
#-----Variables and cell-----#  
#####  
  
clear  
  
units      metal      #eV,atomic charge,angstroms,ps,kelvin,bars,g/mol  
  
dimension 3  
  
boundary p p p  
  
atom_style full  
  
#processors * * * grid numa  
  
read_data Li4OCl2.lammps  
  
group lithium type 1  
  
#replicate 2 2 2  
  
variable T1 equal 500  
  
variable Timer equal step*dt  
  
#####  
#----- Pair styles and electrostatics-----#  
#####  
  
pair_style buck/coul/long 12.0  
  
pair_coeff * * 0.0 1.0 0.0  
  
pair_coeff 1 1 360.5269 0.1609 0  
  
pair_coeff 1 2 292.3 0.3472 0
```

```
pair_coeff 1 3 421.0366 0.33364 0
pair_coeff 2 2 22764.3 0.149 13.185
pair_coeff 2 3 8287 0.259 62.2
pair_coeff 3 3 1227.2 0.3214 14.53
```

```
#pair_style buck/coul/long 10.0
#pair_coeff * * 0.0 1.0 0.0
#pair_coeff 1 4 2088.79 0.346 23.25
#pair_coeff 2 4 1453.8 0.35 0
#pair_coeff 3 4 632.1018 0.2906 0
#pair_coeff 4 4 22764.3 0.149 27.869
```

```
kpspace_style pppm 1e-05
```

```
#####
```

```
# ----- Run Minimization -----#
```

```
#####
```

```
reset_timestep 0
timestep 0.5
thermo 10
thermo_style custom step enthalpy fmax lx ly lz vol press
min_style cg
minimize 1e-25 1e-25 5000 10000
```

```
#####
```

```
# ----- Relax Cell -----#
```

```
#####
```

```
reset_timestep 0
```

```
timestep 0.5
```

```
fix 1 all box/relax aniso 1.0 vmax 0.003
```

```
thermo 1
```

```
thermo_style custom step enthalpy fmax lx ly lz vol press
```

```
min_style cg
```

```
minimize 1e-25 1e-25 5000 10000
```

```
unfix 1
```

```
#####
```

```
# ----- Run NPT T1 -----#
```

```
#####
```

```
reset_timestep 0
```

```
timestep 0.002
```

```
velocity all create ${T1} 4928459 rot yes dist gaussian
```

```
fix 2 all npt temp ${T1} ${T1} 0.01 aniso 1.0 1.0 0.1
```

```
thermo_style custom step v_Timer cpu temp etotal fmax lx ly lz vol press
```

```
thermo 1000
```

```
run 2000
```

```
unfix 2
```

```
reset_timestep 0

timestep 0.002

compute      mymsd lithium msd com yes

variable     msdx equal "c_mymsd[1]"
variable     msdy equal "c_mymsd[2]"
variable     msdz equal "c_mymsd[3]"
variable     msdtot equal "c_mymsd[4]"

fix          msdT1 lithium ave/time 1 1 10000 v_msdx v_msdy v_msdz v_msdtot

file msd${T1}

fix          3 all nvt temp ${T1} ${T1} 0.01

thermo_style custom step v_Timer cpu temp etotal fmax lx ly lz vol press

thermo 5000

#dump dynamics all xyz 100 dynamics.xyz

#dump 4 all atom 100 traj.dat

run          5000000

unfix 3

unfix msdT1
```



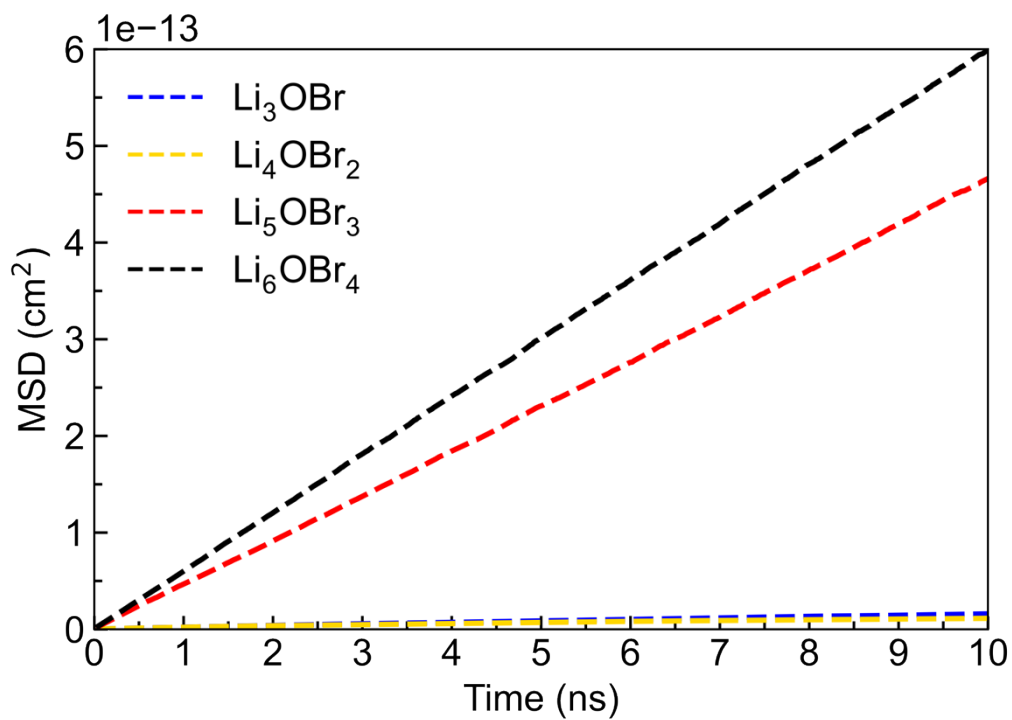

**Figure S1.** MSD plots for  $\text{Li}_x\text{OBr}_{x-2}$  ( $x = 3-6$ ) anti-perovskites at 700 K with an alkali-halide partial Schottky defect concentration of ~2%.

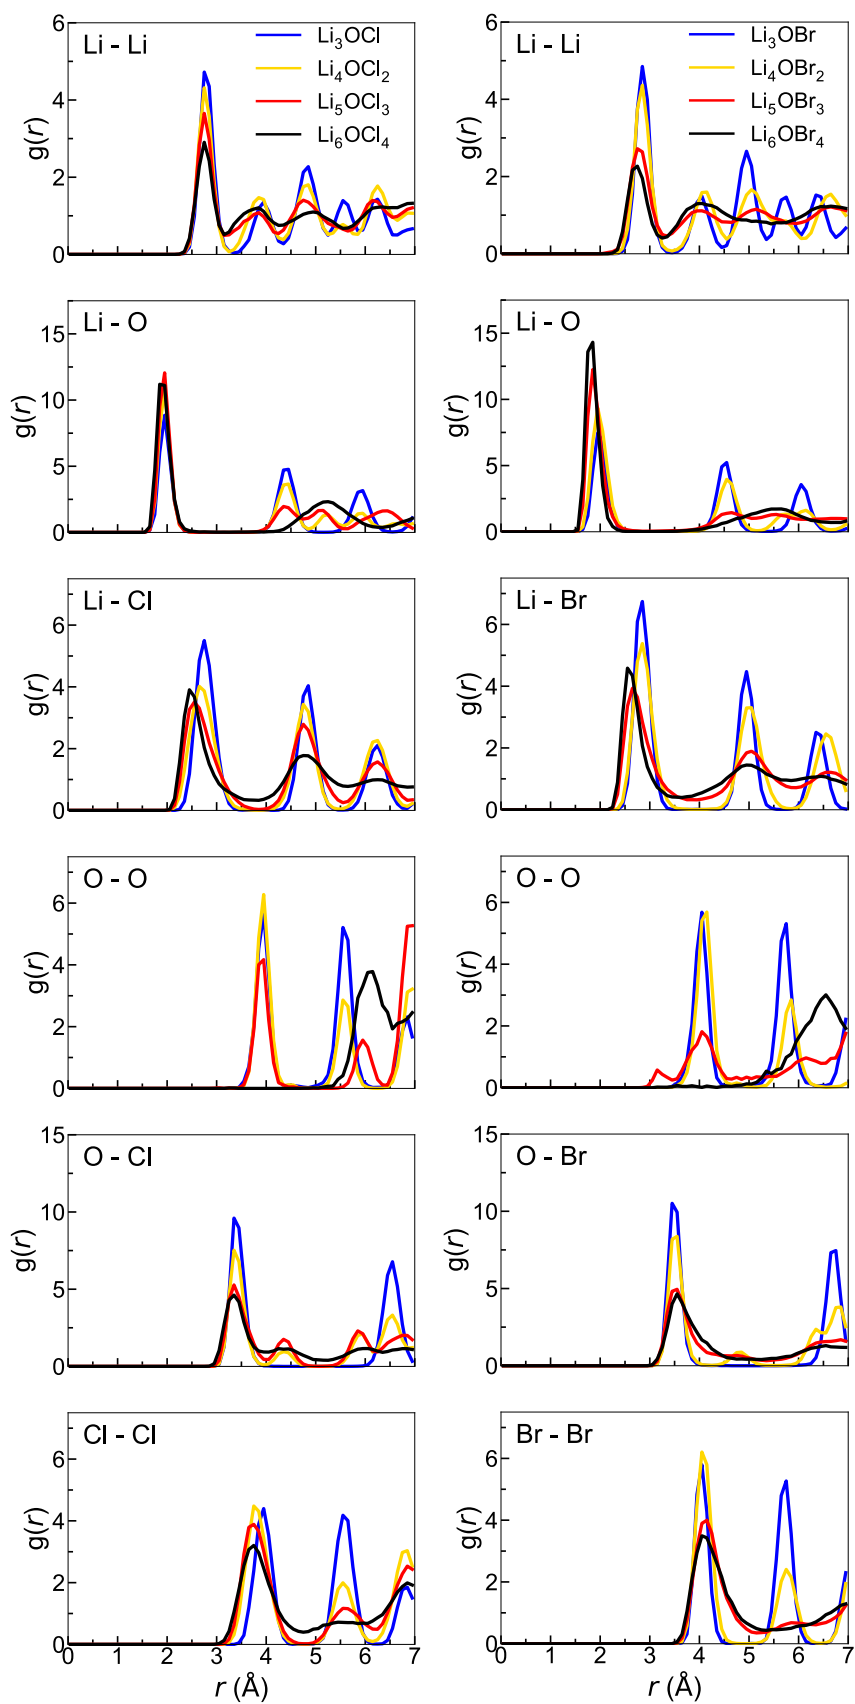

**Figure S2.** Radial distribution functions for  $\text{Li}_x\text{OX}_{x-2}$  ( $X = \text{Cl}$  (left) or  $\text{Br}$  (right);  $x = 3-6$ ) anti-perovskites at 300 K.

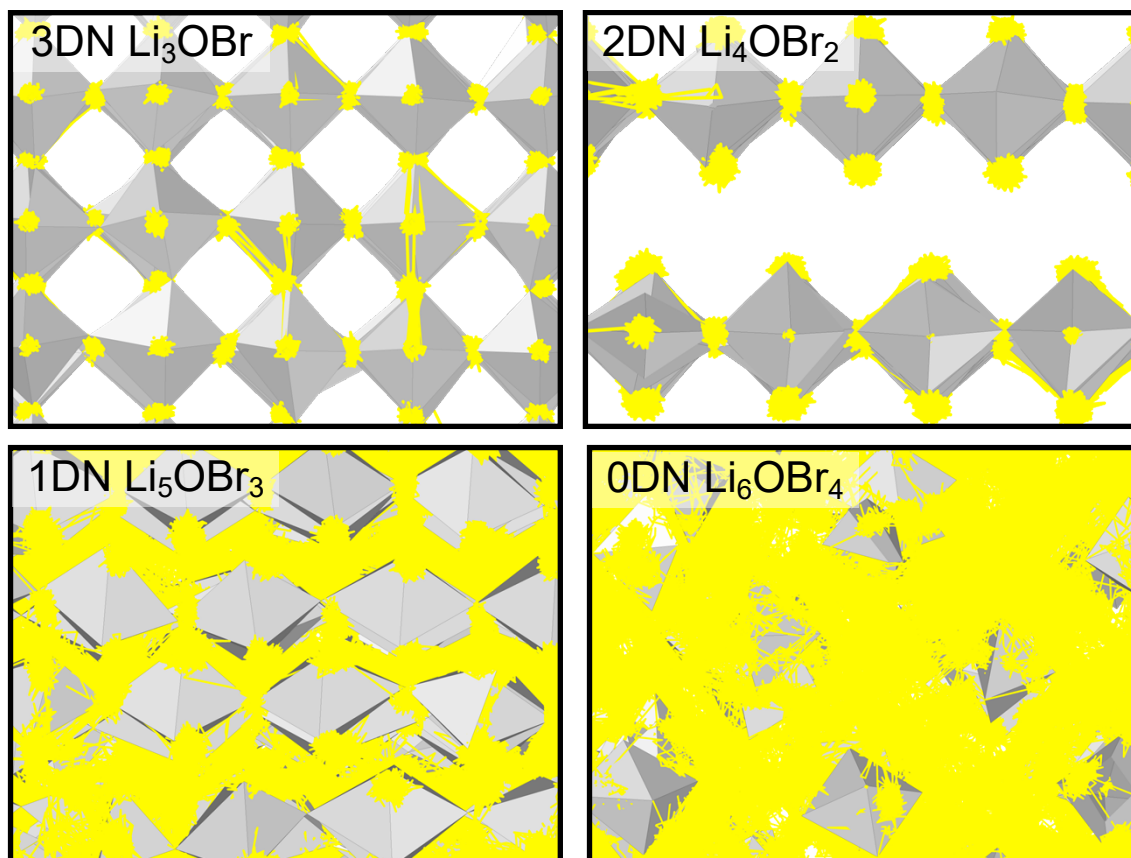

**Figure S3.** Diffusion density plots of Li ions (yellow) overlaid on  $\text{OLi}_6$  (grey) octahedra in  $\text{Li}_x\text{OBr}_{x-2}$  ( $x = 3-6$ ) anti-perovskites at 300 K. Br ions have been omitted for clarity.

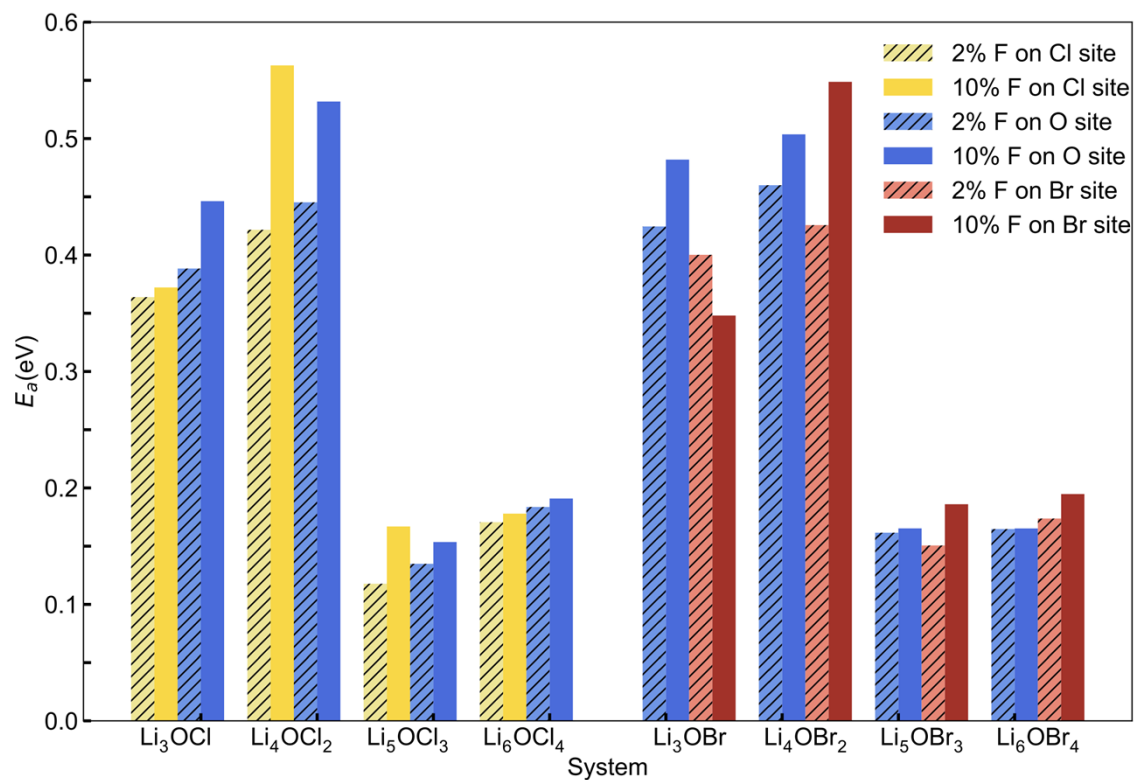

**Figure S4.** Comparison of activation energies ( $E_a$ ) for Li-ion diffusion in 2% and 10% F-doped (a)  $\text{Li}_x\text{OCl}_{x-2}$  and (b)  $\text{Li}_x\text{OBr}_{x-2}$  ( $x = 3-6$ ) anti-perovskites.
